# Supplementary material
Source: PubMed Central journal article supplement (PMC3045074)
Supplement: Supp_Data.pdf [file Supp_Data.pdf]

## Supplementary Data

SUPPLEMENTARY TABLE 1. PROTEINS IDENTIFIED BY iTRAQ-MS ANALYSIS FROM THE PRIMATE TAXONOMY OF THE SWISS-PROT DATABASE

| <i>Abbreviation</i> | <i>Name</i>                                | <i>Abbreviation</i> | <i>Name</i>                                                          |
|---------------------|--------------------------------------------|---------------------|----------------------------------------------------------------------|
| AFAM_HUMAN          | Afamin                                     | HRG_HUMAN           | Histidine-rich glycoprotein                                          |
| AACT_HUMAN          | Alpha-1-antichymotrypsin                   | IGHG2_HUMAN         | Ig gamma-2 chain C region                                            |
| A1AT_CERAE          | Alpha-1-antitrypsin                        | HV305_HUMAN         | Ig heavy chain V-III region BRO                                      |
| A2AP_HUMAN          | Alpha-2-antiplasmin                        | KV114_HUMAN         | Ig kappa chain V-I region OU                                         |
| FETUA_HUMAN         | Alpha-2-HS-glycoprotein                    | LAC_HUMAN           | Ig lambda chain C regions                                            |
| A2MG_PONAB          | Alpha-2-macroglobulin                      | IGJ_HUMAN           | Immunoglobulin J chain                                               |
| ANAG_HUMAN          | Alpha-N-acetylglucosaminidase              | IGLL1_HUMAN         | Immunoglobulin lambda-like polypeptide 1                             |
| ANGT_GORGO          | Angiotensinogen                            | IBP3_HUMAN          | Insulin-like growth factor-binding protein 3                         |
| APOA4_MACFA         | Apolipoprotein A-IV                        | ALS_PAPHA           | Insulin-like growth factor-binding protein complex acid labile chain |
| C4BPA_HUMAN         | C4b-binding protein alpha chain            | ITIH2_HUMAN         | Inter-alpha-trypsin inhibitor heavy chain H2                         |
| CBPN_HUMAN          | Carboxypeptidase N catalytic chain         | ITIH3_PONAB         | Inter-alpha-trypsin inhibitor heavy chain H3                         |
| CRAC1_HUMAN         | Cartilage acidic protein 1                 | ICAM1_MACMU         | Intercellular adhesion molecule 1                                    |
| CD109_HUMAN         | CD109 antigen                              | KAIN_HUMAN          | Kallistatin                                                          |
| CERU_HUMAN          | Ceruloplasmin                              | LUM_HUMAN           | Lumican                                                              |
| CETP_MACFA          | Cholesteryl ester transfer protein         | MASP1_HUMAN         | Mannan-binding lectin serine protease 1                              |
| CHLE_HUMAN          | Cholinesterase                             | MASP2_HUMAN         | Mannan-binding lectin serine protease 2                              |
| CLUS_HUMAN          | Clusterin                                  | MBL2_MACFA          | Mannose-binding protein C                                            |
| FA5_HUMAN           | Coagulation factor V                       | AOC3_PONAB          | Membrane primary amine oxidase                                       |
| FA10_HUMAN          | Coagulation factor X                       | CD14_HUMAN          | Monocyte differentiation antigen CD14                                |
| C1R_MACFA           | Complement C1r subcomponent                | MYG_ERYP            | Myoglobin                                                            |
| C1S_HUMAN           | Complement C1s subcomponent                | PGRP2_HUMAN         | N-Acetylmuramoyl-L-alanine amidase                                   |
| CO2_GORGO           | Complement C2                              | PI16_HUMAN          | Peptidase inhibitor 16                                               |
| YS048_HUMAN         | Complement C3-like protein                 | PHLD_HUMAN          | Phosphatidylinositol-glycan-specific phospholipase D                 |
| CO5_HUMAN           | Complement C5                              | PEDF_HUMAN          | Pigment epithelium-derived factor                                    |
| CO8A_HUMAN          | Complement component C8 alpha chain        | IPSP_HUMAN          | Plasma serine protease inhibitor                                     |
| CO8G_HUMAN          | Complement component C8 gamma chain        | PZP_HUMAN           | Pregnancy zone protein                                               |
| CO9_HUMAN           | Complement component C9                    | AMBP_HUMAN          | Protein AMBP                                                         |
| CFAI_PONAB          | Complement factor I                        | ZPI_HUMAN           | Protein Z-dependent protease inhibitor                               |
| CBG_HUMAN           | Corticosteroid-binding globulin            | THRB_HUMAN          | Prothrombin                                                          |
| CYTC_HUMAN          | Cystatin-C                                 | C163A_CERAE         | Scavenger receptor cysteine-rich type 1 protein M130                 |
| ECM1_HUMAN          | Extracellular matrix protein 1             | SAMP_HUMAN          | Serum amyloid P-component                                            |
| SODE_HUMAN          | Extracellular superoxide dismutase [Cu-Zn] | SHBG_HUMAN          | Sex hormone-binding globulin                                         |
| FETUB_HUMAN         | Fetuin-B                                   | TETN_HUMAN          | Tetranectin                                                          |
| FIBA_CERAE          | Fibrinogen alpha chain                     | THBG_HUMAN          | Thyroxine-binding globulin                                           |
| FIBB_HUMAN          | Fibrinogen beta chain                      | TTHY_MACFA          | Transthyretin                                                        |
| FIBG_HUMAN          | Fibrinogen gamma chain                     | VASN_HUMAN          | Vasorin                                                              |
| FCN2_HUMAN          | Ficolin-2                                  | VINC_HUMAN          | Vinculin                                                             |
| LG3BP_HUMAN         | Galectin-3-binding protein                 | VTDB_HUMAN          | Vitamin D-binding protein                                            |
| GELS_HUMAN          | Gelsolin                                   | PROC_HUMAN          | Vitamin K-dependent protein C                                        |
| GPX3_CEBAP          | Glutathione peroxidase 3                   | VTNC_HUMAN          | Vitronectin                                                          |
| HEP2_HUMAN          | Heparin cofactor 2                         | VWF_HUMAN           | von Willebrand factor                                                |
| HGFA_HUMAN          | Hepatocyte growth factor activator         |                     |                                                                      |
